# Supplementary material for: Cellular dormancy in minimal residual disease following targeted therapy
Source: PubMed Central journal article supplement (PMC8178846; doi:10.1186/s13058-021-01416-9), 2021-06-04

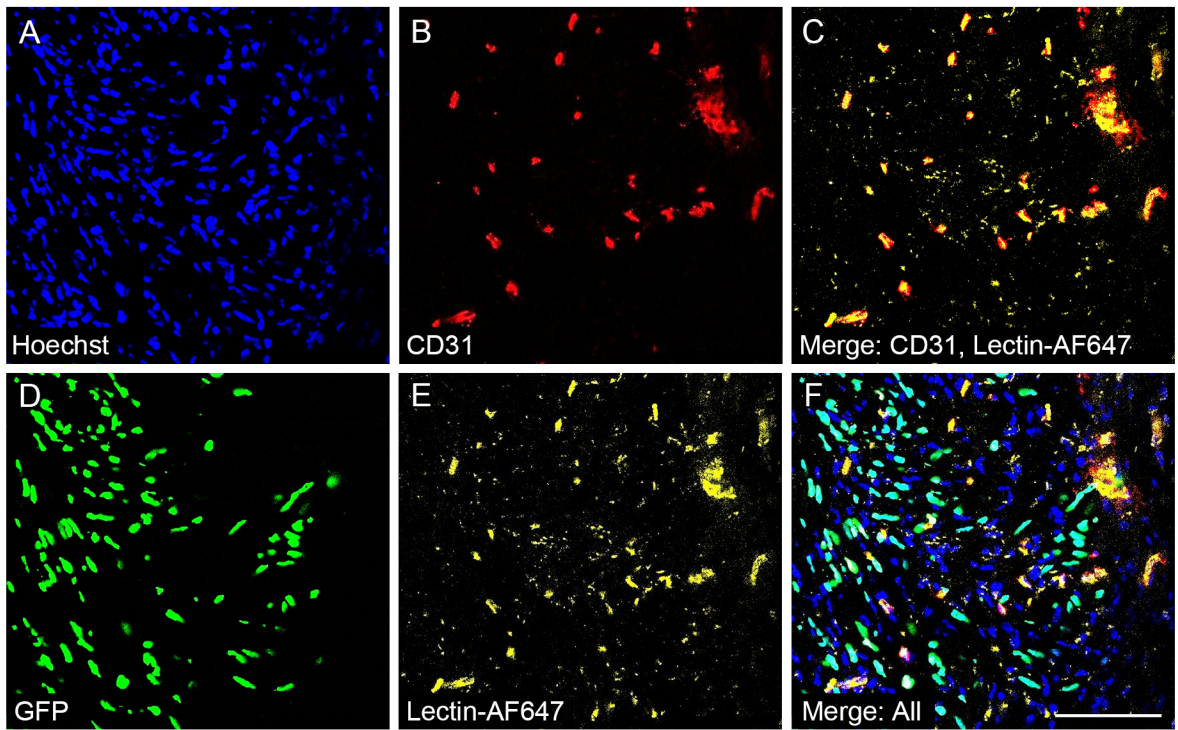

Supplement: 13058_2021_1416_MOESM3_ESM.pdf [file 13058_2021_1416_MOESM3_ESM.pdf]
