# Supplementary material for: Cellular dormancy in minimal residual disease following targeted therapy
Source: Springer Nature journal article supplement (doi:10.1186/s13058-021-01416-9), 2021-06-04
Supplement: MOESM4 [file 19230582]

Gene Sets Down-regulated in Wnt1  
Dormant Residual Tumor Cells

|            | SP_PIR_KEYWORDS                | # Down-regulated |          |                 |
|------------|--------------------------------|------------------|----------|-----------------|
|            |                                | Genes in Cluster | p-value  | FDR (Benjamini) |
| Cluster 1  | <u>Enrichment Score: 38.87</u> |                  |          |                 |
|            | cell cycle                     | 132              | 1.80E-49 | 4.30E-47        |
|            | mitosis                        | 74               | 1.10E-38 | 1.40E-36        |
|            | cell division                  | 88               | 1.50E-38 | 1.50E-36        |
| Cluster 2  | <u>Enrichment Score: 24.81</u> |                  |          |                 |
|            | kinetochore                    | 36               | 1.60E-25 | 1.10E-23        |
|            | chromosomal protein            | 42               | 1.00E-16 | 4.10E-15        |
| Cluster 3  | <u>Enrichment Score: 17.26</u> |                  |          |                 |
|            | ribonucleoprotein              | 71               | 1.00E-23 | 6.10E-22        |
|            | ribosomal protein              | 52               | 1.70E-19 | 9.20E-18        |
| Cluster 4  | <u>Enrichment Score: 16.28</u> |                  |          |                 |
|            | dna replication                | 34               | 2.00E-17 | 8.90E-16        |
| Cluster 6  | <u>Enrichment Score: 11.13</u> |                  |          |                 |
|            | DNA damage                     | 38               | 8.40E-09 | 2.30E-07        |
|            | dna repair                     | 34               | 5.30E-08 | 1.40E-06        |
| Cluster 7  | <u>Enrichment Score: 11</u>    |                  |          |                 |
|            | atp-binding                    | 152              | 9.10E-12 | 2.90E-10        |
|            | nucleotide-binding             | 176              | 3.00E-10 | 9.10E-09        |
| Cluster 8  | <u>Enrichment Score: 7.67</u>  |                  |          |                 |
|            | ubl conjugation                | 83               | 7.20E-13 | 2.50E-11        |
|            | isopeptide bond                | 42               | 1.90E-06 | 3.80E-05        |
| Cluster 9  | <u>Enrichment Score: 6.33</u>  |                  |          |                 |
|            | ribosome biogenesis            | 15               | 9.10E-07 | 1.90E-05        |
|            | rrna processing                | 15               | 3.00E-05 | 5.00E-04        |
| Cluster 10 | <u>Enrichment Score: 6.03</u>  |                  |          |                 |
|            | cytoskeleton                   | 71               | 2.00E-06 | 4.00E-05        |
|            | microtubule                    | 34               | 1.50E-05 | 2.80E-04        |
| Cluster 12 | <u>Enrichment Score: 5.62</u>  |                  |          |                 |
|            | chromosomal protein            | 42               | 1.00E-16 | 4.10E-15        |
| Cluster 15 | <u>Enrichment Score: 4.79</u>  |                  |          |                 |
|            | molecular chaperone            | 7                | 1.80E-04 | 2.50E-03        |
| Cluster 20 | <u>Enrichment Score: 3.52</u>  |                  |          |                 |
|            | mitochondrion                  | 78               | 7.80E-04 | 1.00E-02        |
|            | transit peptide                | 47               | 4.60E-03 | 4.40E-02        |

Gene Sets Down-regulated in HER2/neu  
Dormant Residual Tumor Cells

|            | SP_PIR_KEYWORDS                | # Down-regulated |          |                 |
|------------|--------------------------------|------------------|----------|-----------------|
|            |                                | Genes in Cluster | p-value  | FDR (Benjamini) |
| Cluster 1  | <u>Enrichment Score: 25.71</u> |                  |          |                 |
|            | ribonucleoprotein              | 85               | 3.90E-31 | 6.20E-29        |
|            | ribosomal protein              | 67               | 1.70E-29 | 2.10E-27        |
| Cluster 2  | <u>Enrichment Score: 24.79</u> |                  |          |                 |
|            | cell division                  | 79               | 7.80E-28 | 7.40E-26        |
|            | cell cycle                     | 107              | 3.10E-27 | 2.40E-25        |
|            | mitosis                        | 62               | 6.50E-25 | 3.40E-23        |
| Cluster 4  | <u>Enrichment Score: 12.94</u> |                  |          |                 |
|            | mitochondrion                  | 149              | 4.70E-26 | 2.80E-24        |
|            | transit peptide                | 85               | 1.50E-14 | 5.80E-13        |
| Cluster 5  | <u>Enrichment Score: 11.29</u> |                  |          |                 |
|            | chromosomal protein            | 33               | 5.30E-09 | 1.30E-07        |
| Cluster 6  | <u>Enrichment Score: 9.67</u>  |                  |          |                 |
|            | kinetochore                    | 26               | 4.40E-13 | 1.60E-11        |
| Cluster 7  | <u>Enrichment Score: 9.26</u>  |                  |          |                 |
|            | ubl conjugation                | 88               | 1.90E-12 | 6.40E-11        |
|            | isopeptide bond                | 51               | 6.30E-09 | 1.40E-07        |
| Cluster 8  | <u>Enrichment Score: 9.1</u>   |                  |          |                 |
|            | rrna processing                | 22               | 7.50E-10 | 2.10E-08        |
|            | ribosome biogenesis            | 16               | 5.40E-07 | 9.50E-06        |
| Cluster 9  | <u>Enrichment Score: 7.04</u>  |                  |          |                 |
|            | dna replication                | 27               | 3.40E-10 | 1.00E-08        |
| Cluster 10 | <u>Enrichment Score: 6.69</u>  |                  |          |                 |
|            | nucleotide-binding             | 189              | 1.20E-09 | 3.30E-08        |
|            | atp-binding                    | 152              | 2.10E-08 | 4.10E-07        |
| Cluster 11 | <u>Enrichment Score: 6.44</u>  |                  |          |                 |
|            | dna repair                     | 33               | 1.90E-06 | 3.00E-05        |
|            | DNA damage                     | 35               | 3.20E-06 | 4.60E-05        |
| Cluster 14 | <u>Enrichment Score: 5.85</u>  |                  |          |                 |
|            | cytoskeleton                   | 67               | 6.10E-04 | 6.30E-03        |
| Cluster 19 | <u>Enrichment Score: 4.99</u>  |                  |          |                 |
|            | molecular chaperone            | 6                | 2.70E-03 | 2.30E-02        |
| Cluster 25 | <u>Enrichment Score: 3.72</u>  |                  |          |                 |
|            | microtubule                    | 28               | 9.00E-03 | 6.70E-02        |
