# Supplementary material for: Cellular dormancy in minimal residual disease following targeted therapy
Source: Springer Nature journal article supplement (doi:10.1186/s13058-021-01416-9), 2021-06-04

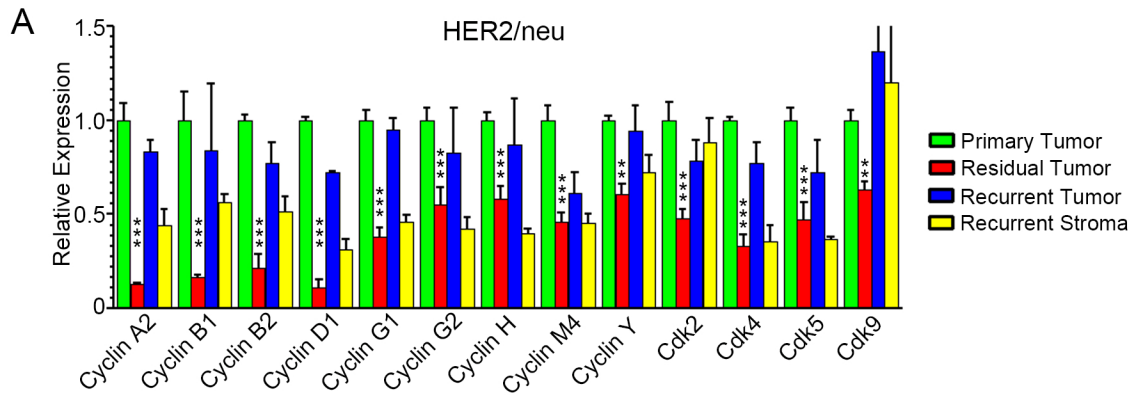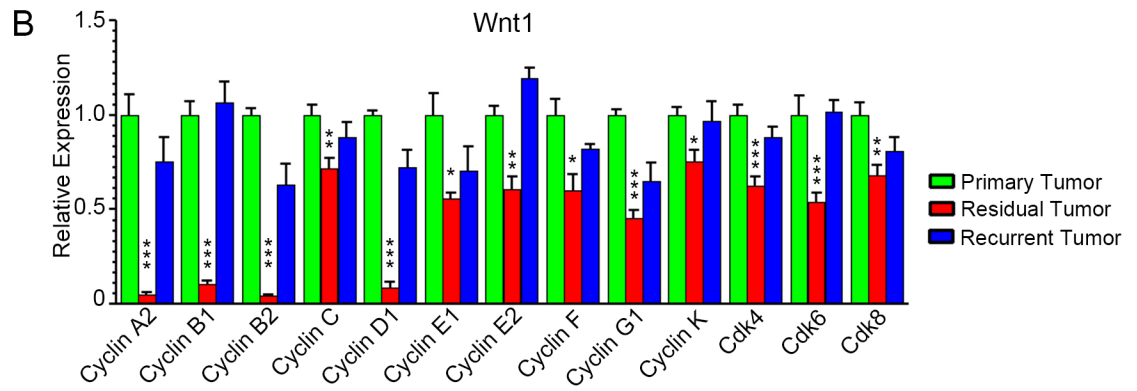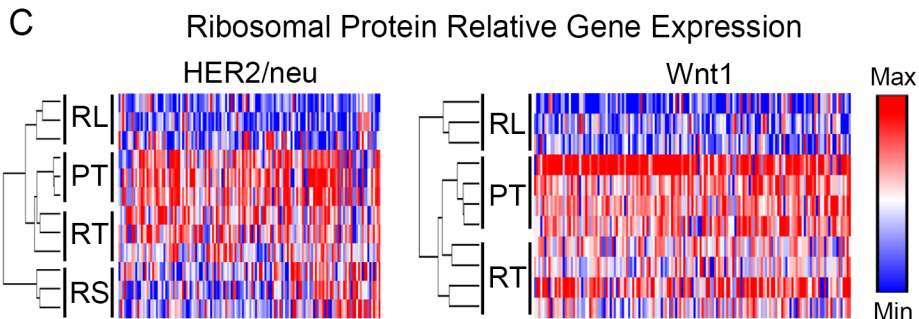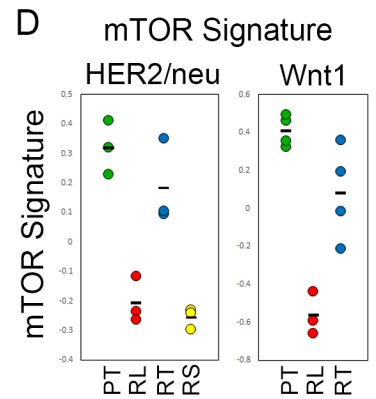

Supplement: MOESM5 [file 19230582]
