# Supplementary material for: Cellular dormancy in minimal residual disease following targeted therapy
Source: Springer Nature journal article supplement (doi:10.1186/s13058-021-01416-9), 2021-06-04
Supplement: MOESM6 [file 19230582]

Gene Sets Up-regulated in Wnt1  
Dormant Residual Tumor Cells

|           | SP_PIR_KEYWORDS                | # Up-regulated   |          |                 |
|-----------|--------------------------------|------------------|----------|-----------------|
|           |                                | Genes in Cluster | p-value  | FDR (Benjamini) |
| Cluster 1 | <u>Enrichment Score: 26.84</u> |                  |          |                 |
|           | signal                         | 276              | 8.20E-36 | 3.20E-33        |
|           | glycoprotein                   | 302              | 2.00E-31 | 4.00E-29        |
|           | Secreted                       | 151              | 6.80E-24 | 9.00E-22        |
| Cluster 2 | disulfide bond                 | 211              | 1.50E-21 | 1.20E-19        |
|           | <u>Enrichment Score: 15.65</u> |                  |          |                 |
| Cluster 3 | extracellular matrix           | 42               | 2.00E-15 | 1.30E-13        |
|           | <u>Enrichment Score: 14.27</u> |                  |          |                 |
| Cluster 4 | cell adhesion                  | 67               | 1.20E-21 | 1.20E-19        |
|           | <u>Enrichment Score: 6.43</u>  |                  |          |                 |
| Cluster 5 | membrane                       | 331              | 2.40E-10 | 1.40E-08        |
|           | transmembrane                  | 305              | 7.70E-08 | 3.40E-06        |
| Cluster 6 | <u>Enrichment Score: 4.94</u>  |                  |          |                 |
|           | heparin-binding                | 11               | 1.10E-04 | 3.10E-03        |

Gene Sets Up-regulated in HER2/neu  
Dormant Residual Tumor Cells

|           | SP_PIR_KEYWORDS                | # Up-regulated   |          |                 |
|-----------|--------------------------------|------------------|----------|-----------------|
|           |                                | Genes in Cluster | p-value  | FDR (Benjamini) |
| Cluster 1 | <u>Enrichment Score: 12.94</u> |                  |          |                 |
|           | signal                         | 163              | 2.60E-16 | 8.00E-14        |
|           | glycoprotein                   | 186              | 2.80E-16 | 6.00E-14        |
|           | Secreted                       | 92               | 9.90E-13 | 1.20E-10        |
| Cluster 2 | disulfide bond                 | 124              | 1.50E-09 | 1.30E-07        |
|           | <u>Enrichment Score: 5.93</u>  |                  |          |                 |
| Cluster 3 | extracellular matrix           | 21               | 5.30E-06 | 3.10E-04        |
|           | <u>Enrichment Score: 5.75</u>  |                  |          |                 |
| Cluster 6 | cell adhesion                  | 33               | 1.10E-07 | 7.60E-06        |
|           | <u>Enrichment Score: 2.83</u>  |                  |          |                 |
| Cluster 7 | heparin-binding                | 7                | 4.50E-03 | 1.50E-01        |
|           | <u>Enrichment Score: 2.31</u>  |                  |          |                 |
| Cluster 7 | membrane                       | 196              | 1.20E-03 | 5.00E-02        |
|           | transmembrane                  | 184              | 3.40E-03 | 1.30E-01        |
