# Supplementary material for: Cellular dormancy in minimal residual disease following targeted therapy
Source: Springer Nature journal article supplement (doi:10.1186/s13058-021-01416-9), 2021-06-04
Supplement: MOESM10 [file 19230582]

Additional File 10  
Table S4

| HER2/neu<br>Donor Tumor Type | HER2/neu<br>Orthotopic Tumor<br>Type | # Tumor Cells Injected |        |       |      |      | TIC<br>frequency | 95%CI<br>Upper<br>Limit | 95%CI<br>Lower Limit |
|------------------------------|--------------------------------------|------------------------|--------|-------|------|------|------------------|-------------------------|----------------------|
|                              |                                      | 50,000                 | 10,000 | 1,000 | 100  | 10   |                  |                         |                      |
| Donor Tumor A                | Primary Tumor A                      | 7/8                    | 4/8    | 0/8   | 0/8  | 0/8  | 1 in 20,717      | 1 in 10,363             | 1 in 41,420          |
|                              | Residual Lesion A                    | 2/8                    | 0/8    | 0/8   | 0/8  | 0/8  | 1 in 218,487     | 1 in 55,163             | 1 in 865,380         |
| Donor Tumor B                | Primary Tumor B                      | 6/8                    | 2/10   | 0/10  | 0/10 | 0/12 | 1 in 40,033      | 1 in 19,563             | 1 in 81,923          |
|                              | Residual Lesion B                    | 1/4                    | 0/10   | 0/10  | 0/10 | 0/12 | 1 in 285,390     | 1 in 41,155             | 1 in 1,979,066       |
