# Supplementary material for: Cellular dormancy in minimal residual disease following targeted therapy
Source: Springer Nature journal article supplement (doi:10.1186/s13058-021-01416-9), 2021-06-04
Supplement: MOESM11 [file 19230582]

| HER2/neu-Prim1<br>H2BeGFP<br>Donor Tumor Type | <i>nu/nu</i> recipient on<br>Doxycycline? | # Tumor<br>Cells |     |     | TIC<br>frequency | 95%CI<br>Upper<br>Limit | 95%CI<br>Lower<br>Limit |
|-----------------------------------------------|-------------------------------------------|------------------|-----|-----|------------------|-------------------------|-------------------------|
|                                               |                                           | 500              | 50  | 5   |                  |                         |                         |
| Primary Tumor                                 | Yes                                       | 6/6              | 6/6 | 5/6 | 1 in 3           | 1 in 1                  | 1 in 8                  |
| Residual Lesion                               | Yes                                       | 6/6              | 6/6 | 3/5 | 1 in 5           | 1 in 2                  | 1 in 17                 |
| Primary Tumor                                 | No                                        | 0/6              | 0/6 | 0/6 | < 1 in 3,073     |                         |                         |
| Residual Lesion                               | No                                        | 4/6              | 0/6 | 1/6 | 1 in 427         | 1 in 168                | 1 in 1,085              |
